# Supplementary material for: CUL3/SPOP complex prevents immune escape and enhances chemotherapy sensitivity of ovarian cancer cells through degradation of PD-L1 protein
Source: PubMed Central journal article supplement — J Immunother Cancer. 2022 Oct 5;10(10):e005270. doi: 10.1136/jitc-2022-005270 (PMC9535172; doi:10.1136/jitc-2022-005270), 2022-10-05
Supplement: jitc-2022-005270supp003.pdf [file jitc-2022-005270supp003.pdf]

**Fig. S1** Correlation of differentially expressed E3 ubiquitin ligase in the ovarian cancer related microarray dataset GSE63885 with prognosis in patients with ovarian cancer.

**Fig. S2** Representative flow cytometry images of figure 3 (A, figure 3E. B, figure 3F).

**Fig. S3** Schematic diagram of binding sites of PD-L1 and SPOP. A, Schematic diagram of pD-L1 protein structure. B, Binding sites of PD-L1 protein to SPOP substrate SRC3 and ERG domains.
