# Supplementary material for: CUL3/SPOP complex prevents immune escape and enhances chemotherapy sensitivity of ovarian cancer cells through degradation of PD-L1 protein
Source: PubMed Central journal article supplement — J Immunother Cancer. 2022 Oct 5;10(10):e005270. doi: 10.1136/jitc-2022-005270 (PMC9535172; doi:10.1136/jitc-2022-005270), 2022-10-05
Supplement: jitc-2022-005270supp005.pdf [file jitc-2022-005270supp005.pdf]

**Table S1** RT-qPCR primer sequences

| Genes                 | Primer sequences                                                             |
|-----------------------|------------------------------------------------------------------------------|
| CUL3 (human)          | Forward 5'-TGTCCAAGGTTGCTAGCAGG-3'<br>Reverse 5'-TTTTCTCCTGAGAGCTGGCG-3'     |
| CUL3 (mouse)          | Forward 5'-CTCTTTAGGTGGTGTGATCTC-3'<br>Reverse 5'-CTTCTAAATATCTCAAAGCATG-3'  |
| SPOP (human)          | Forward 5'-CCTGGAGCGCTTAAAGGTCA-3'<br>Reverse 5'-AAAGGGAACACAGTGACGCA-3'     |
| PD-L1 (human)         | Forward 5'-TGGCATTGCTGAACGCATTT-3'<br>Reverse 5'-TGCAGCCAGGTCTAATTGTTTT-3'   |
| PD-L1 (mouse)         | Forward 5'-CTGGGATCCATCCTGTTGTTCC-3'<br>Reverse 5'-TTACGTCTCCTCGAATTGTG-3'   |
| IL-2 (human)          | Forward 5'-TGCTGATGAGACAGCAACCA-3'<br>Reverse 5'-GAGCCCCTAGGGCTTACAAAA-3'    |
| IFN- $\gamma$ (human) | Forward 5'-GTCGCCAGCAGCTAAAACAG-3'<br>Reverse 5'-GCACCAGGCATGAAATCTCC-3'     |
| GAPDH (human)         | Forward 5'-GGCTGTTGTCATACTTCTCATGG-3'<br>Reverse 5'-GGAGCGAGATCCCTCCAAAAT-3' |
| GAPDH (mouse)         | Forward 5'-CTGAGGGCCCACTGAAGGGCA-3'<br>Reverse 5'-GCAATGCCAGCCCCGGCATC-3'    |
