# Supplementary figures and images for: CUL3/SPOP complex prevents immune escape and enhances chemotherapy sensitivity of ovarian cancer cells through degradation of PD-L1 protein
Source: PubMed Central journal article supplement — J Immunother Cancer. 2022 Oct 5;10(10):e005270. doi: 10.1136/jitc-2022-005270 (PMC9535172; doi:10.1136/jitc-2022-005270), 2022-10-05

**A**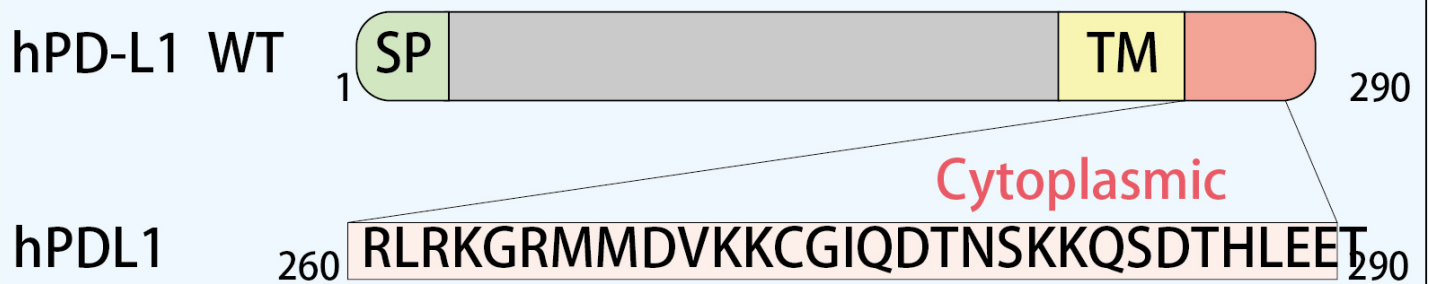**B**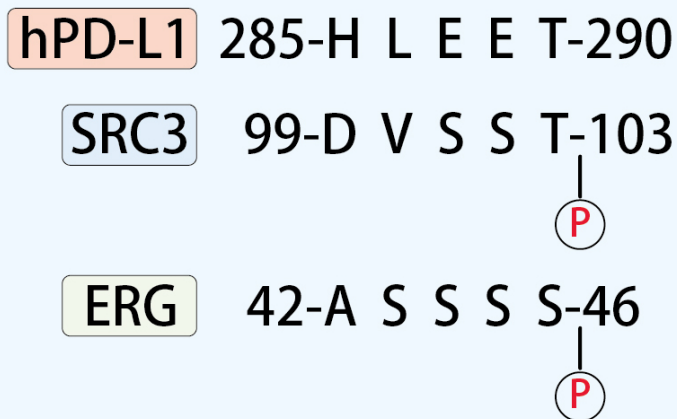

Supplement: jitc-2022-005270supp002.pdf [file jitc-2022-005270supp002.pdf]

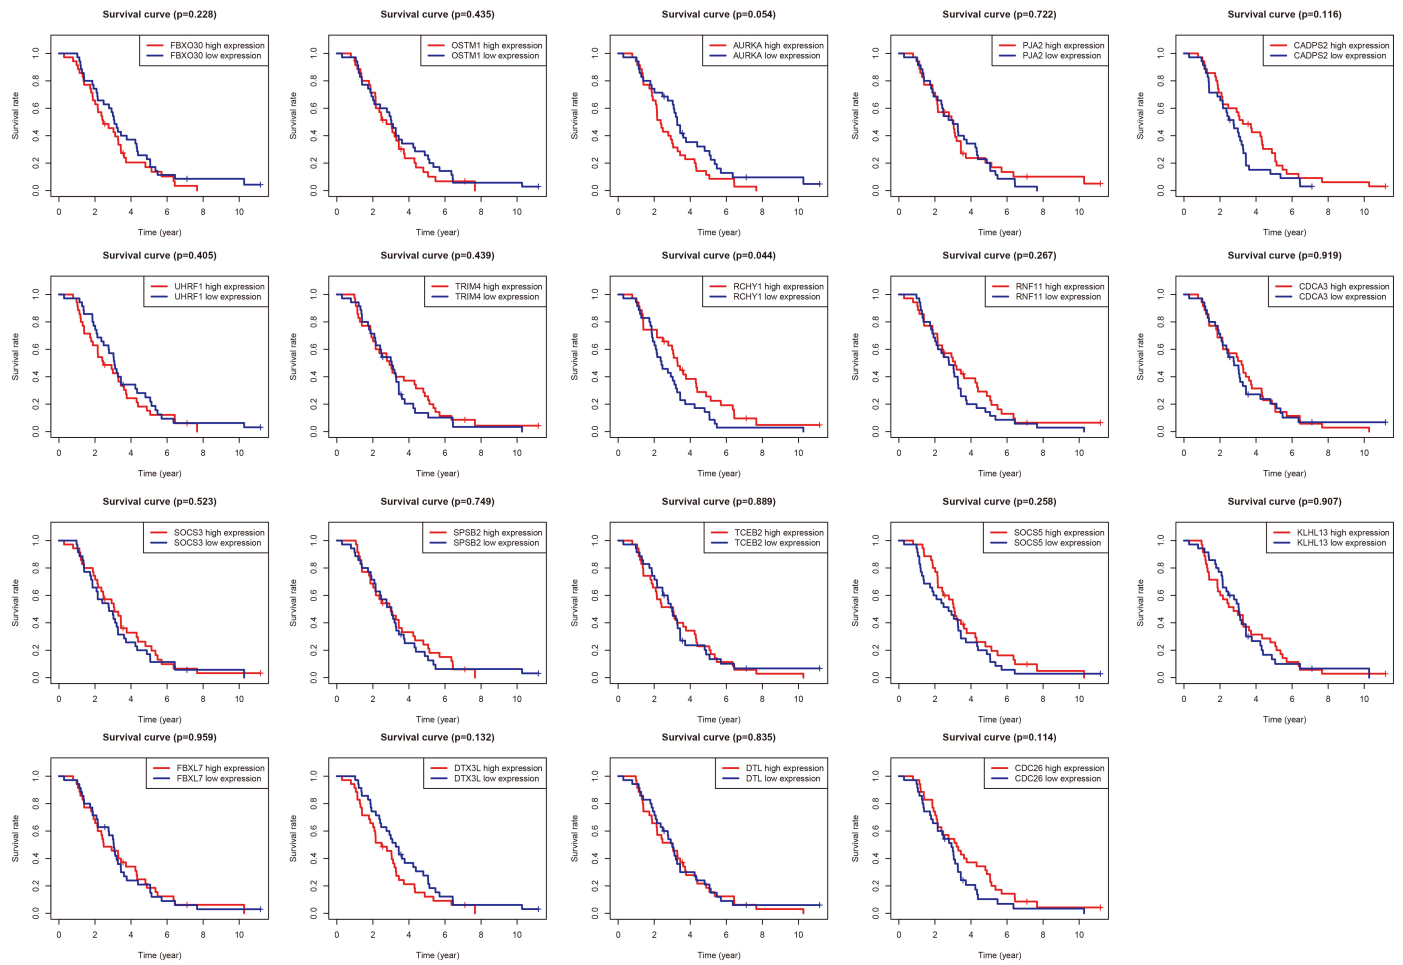

Supplement: jitc-2022-005270supp004.pdf [file jitc-2022-005270supp004.pdf]
